# Supplementary material for: The tumor therapy landscape of synthetic lethality
Source: PubMed Central journal article supplement (PMC7904840; doi:10.1038/s41467-021-21544-2), 2021-02-24
Supplement: 41467_2021_21544_MOESM1_ESM.pdf [file 41467_2021_21544_MOESM1_ESM.pdf]

## **Supplementary information**

Supplementary Fig. 1. Boxplot and Bipartite.

Supplementary Fig. 2. Knockdown efficiency of *CDKN2A* was determined by Western blot.

Supplementary Table 1. Literature supports for the top 20 repurposable drug candidates.

Supplementary Table 2. Clinical trial records of the top repurposable drug candidates based on SL and SDL respectively.

Supplementary Table 3. Best repurposable drug candidates of SL and SDL.

Supplementary Table 4. Mapping between tumors and cancer types.

Supplementary Table 5. Primer sequences used in this study.

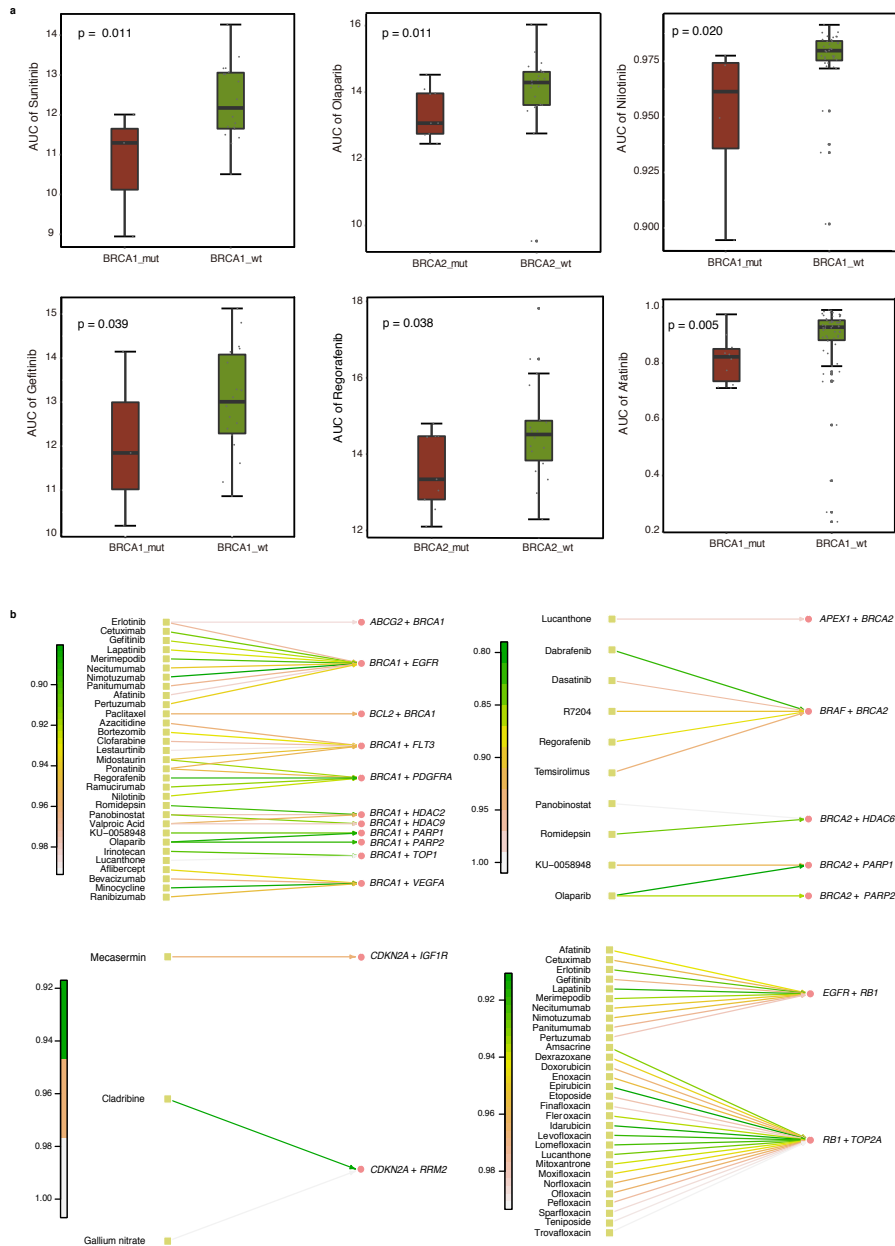

### Supplementary Fig. 1. Boxplot and Bipartite.

a, Boxplot of one-sided Wilcoxon rank sum test based on SL (AUC). Box plots indicate median (middle line), 25th, 75th percentile (box) and 5th and 95th percentile (whiskers) as well as outliers (single points),  $n = 42$  independent experiments in AUC of Sunitinib,  $n = 31$  independent experiments in AUC of Olaparib,  $n = 40$  independent experiments in AUC of Nilotinib,  $n = 84$  independent experiments in AUC of Gefitinib,  $n = 27$  independent experiments in AUC of Regorafenib,  $n = 64$  independent experiments in AUC of Afatinib; Dots represent cancer cell lines.

b, Bipartite graph between drug (yellow square) and SL pairs (pink circle). Side annotation bar represents DrugScore.

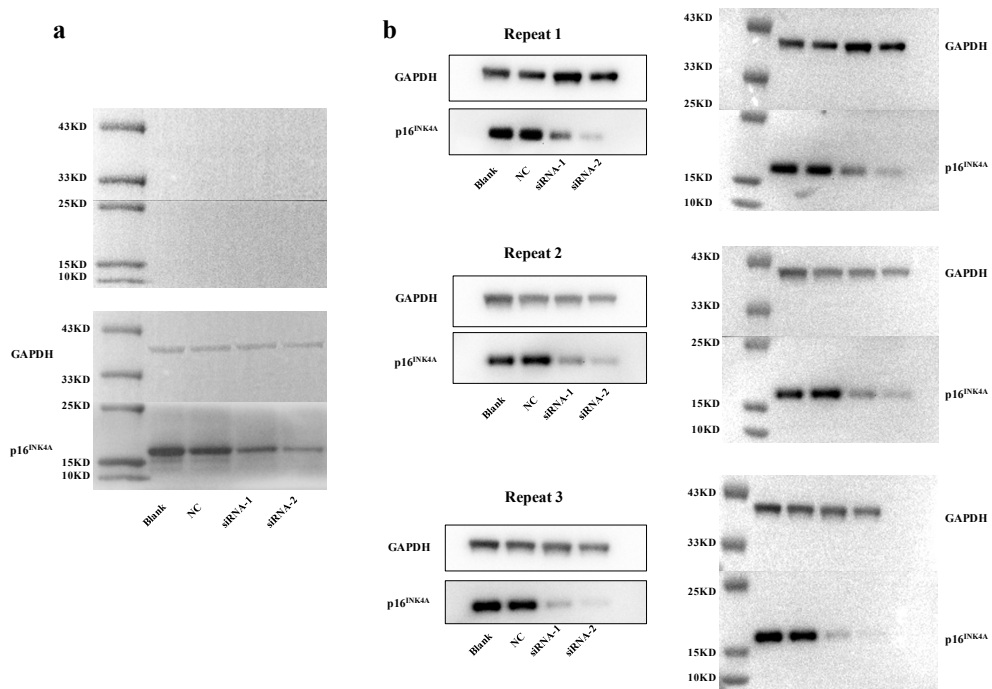

**Supplementary Fig. 2. Knockdown efficiency of *CDKN2A* was determined by Western blot.**

a. Full scans of figure 6(b).

b. Knockdown efficiency of *CDKN2A* was repeated at 3 times independently with similar results.

**Supplementary Table 1: Supported drug repositioning results by literatures(Top 20)**

| Type | Rank | Drug       | Known Indications                                         | Repositioning of the Cancer                   | Target Gene | GeneA+GeneB   | MutationGene | Score |
|------|------|------------|-----------------------------------------------------------|-----------------------------------------------|-------------|---------------|--------------|-------|
| SL   | 3    | Rucaparib  | Breast cancer                                             | Hereditary Breast and Ovarian Cancer Syndrome | PARP1       | BRCA1 + PARP1 | BRCA1        | 0.913 |
| SL   | 4    | Rucaparib  | Breast cancer                                             | Hereditary Breast and Ovarian Cancer Syndrome | PARP1       | BRCA2 + PARP1 | BRCA2        | 0.894 |
| SL   | 14   | Romidepsin | Peripheral T-cell lymphoma                                | Hereditary Breast and Ovarian Cancer Syndrome | HDAC2       | BRCA1 + HDAC2 | BRCA1        | 0.648 |
| SL   | 17   | Erlotinib  | Colon cancer; Glioma; Breast cancer; Head and neck cancer | Retinoblastoma                                | EGFR        | EGFR + RB1    | RB1          | 0.607 |
| SL   | 18   | Erlotinib  | Pancreatic cancer                                         | Hereditary Breast and Ovarian Cancer Syndrome | EGFR        | BRCA1 + EGFR  | BRCA1        | 0.583 |
| SL   | 20   | Rucaparib  | Ovarian cancer                                            | Hereditary Breast and Ovarian Cancer Syndrome | PARP2       | BRCA2 + PARP2 | BRCA2        | 0.564 |
| SDL  | 6    | Vandetanib | Solid tumours                                             | Carcinoma, Pancreatic Ductal                  | EGFR        | EGFR + NOTCH1 | NOTCH1       | 0.687 |
| SDL  | 20   | Lapatinib  | Breast cancer                                             | Carcinoma, Pancreatic Ductal                  | EGFR        | EGFR + NOTCH1 | NOTCH1       | 0.428 |

**Literatures:**

- 1 D. C. Pearre and K. S. Tewari, "Targeted treatment of advanced ovarian cancer: Spotlight on rucaparib," *Ther. Clin. Risk Manag.*, vol. 14, pp. 2189–2201, 2018
- 2 D. Pchejetski, A. Alfraidi, K. Sacco, H. Alshaker, A. Muhammad, and L. Monzon, "Histone deacetylases as new therapy targets for platinum-resistant epithelial ovarian cancer," *J. Cancer Res. Clin. Oncol.*, vol. 142, no. 8, pp. 1659–1671, 2016
- 3 Y. Shao et al., "Erlotinib has tumor inhibitory effect in human retinoblastoma cells," *Biomed. Pharmacother.*, vol. 85, pp. 479–485, 2017.
- 4 K. Nakai, M. C. Hung, and H. Yamaguchi, "A perspective on anti-EGFR therapies targeting triple-negative breast cancer," *Am. J. Cancer Res.*, vol. 6, no. 8, pp. 1609–1623, 2016.
- 5 A. Turk and K. B. Wisinski, "PARP Inhibition in BRCA-Mutant Breast Cancer," *Cancer*, vol. 124, no. 12, p. 2498, 2018.
- 6 A. D. Singhi et al., "Real-Time Targeted Genome Profile Analysis of Pancreatic Ductal Adenocarcinomas Identifies Genetic Alterations That Might Be Targeted With Existing Drugs or Used as Biomarkers," *Gastroenterology*, vol. 156, no. 8, pp. 2242–2253.e4, 2019.
- 7 N. Walsh et al., "EGFR and HER2 inhibition in pancreatic cancer," *Invest New Drugs*, vol. 31, pp. 558–566, 2013.

**Supplementary Table 2: Clinical trial records of the top repurposable drug candidates based on SL and SDL**

| Class | Drug         | Repositioning of cancer                          | Clinical trial title                                                                                                                                                  |
|-------|--------------|--------------------------------------------------|-----------------------------------------------------------------------------------------------------------------------------------------------------------------------|
| SL    | Olaparib     | Hereditary Breast and Ovarian Cancer Syndrome    | Palbociclib With Cetuximab and IMRT for Locally Advanced Squamous Cell Carcinoma                                                                                      |
| SL    | Cetuximab    | Retinoblastoma                                   | Study of Treatment for Patients With Cancer of the Eye -Retinoblastoma                                                                                                |
| SL    | Gefitinib    | Retinoblastoma                                   | PErsonalized TREATment of High-risk MAMmary Cancer - the PETREMAC Trial                                                                                               |
| SL    | Lapatinib    | Retinoblastoma                                   | Vincristine, Carboplatin, and Etoposide or Observation Only in Treating Patients Who Have Undergone Surgery for Newly Diagnosed Retinoblastoma                        |
| SL    | Paclitaxel   | Hereditary Breast and Ovarian Cancer Syndrome    | Molecular Phenotype Changes and Personalized Treatment for CRPC                                                                                                       |
| SL    | Pertuzumab   | Retinoblastoma                                   | Molecular Phenotype Changes and Personalized Treatment for CRPC                                                                                                       |
| SL    | Temsirolimus | Hereditary Breast and Ovarian Cancer Syndrome    | -PATROL - Non-interventional Study (NIS) to Collect Clinical and Patient Reported Outcome Data in an Olaparib Treated BRCA <sup>+</sup> PSR Ovarian Cancer Population |
| SL    | Epirubicin   | Retinoblastoma                                   | Veliparib, Carboplatin, and Paclitaxel in Treating Patients With Advanced Solid Cancer                                                                                |
| SL    | Etoposide    | Retinoblastoma                                   | Anastrozole, Palbociclib, Trastuzumab and Pertuzumab in Her-positive, Her2-positive Metastatic Breast                                                                 |
| SL    | Doxorubicin  | Retinoblastoma                                   | Temsirolimus and Vinorelbine Ditartrate in Treating Patients With Unresectable or Metastatic Solid Tumors                                                             |
| SDL   | Vandetanib   | Lymphoma                                         | Testing Afatinib as a Potential Targeted Treatment in Cancers With HER2 Genetic Changes (MATCH-Subprotocol B)                                                         |
| SDL   | Afatinib     | Lymphoma                                         | Serial Measurements of Molecular and Architectural Responses to Therapy (SMMART) PRIME Trial                                                                          |
| SDL   | Cetuximab    | Precursor T-Cell Lymphoblastic Leukemia-Lymphoma | Safety, Tolerability, Pharmacokinetics and Preliminary Efficacy of SCT200 in Patients With Advanced Solid Tumors                                                      |
| SDL   | Afatinib     | Precursor T-Cell Lymphoblastic Leukemia-Lymphoma | CD19 CAR-T Cells for Patients With Relapse and Refractory CD19+ B-ALL.                                                                                                |
| SDL   | Panitumumab  | Lymphoma                                         | A Phase 1 Dose-Escalation Study in Advanced Solid Tumors, Lymphomas or Multiple Myeloma                                                                               |
| SDL   | Lidocaine    | Lymphoma                                         | Serial Measurements of Molecular and Architectural Responses to Therapy (SMMART) PRIME Trial                                                                          |
| SDL   | Cetuximab    | Lymphoma                                         | A Study of LY2875358 in Japanese Participants With Advanced Cancer                                                                                                    |
| SDL   | Erlotinib    | Lymphoma                                         | S0528 Lapatinib and Everolimus in Treating Patients With Advanced Solid Tumors or Non-Hodgkin's Lymphoma                                                              |
| SDL   | Erlotinib    | Precursor T-Cell Lymphoblastic Leukemia-Lymphoma | Recalcitrant Pruritus in Cutaneous T-Cell Lymphoma                                                                                                                    |
| SDL   | Gefitinib    | Lymphoma                                         | REAL3 Trial of Efficacy of EOX With/Without Panitumumab in Previously Untreated Adv OG Cancer                                                                         |
| SDL   | Lapatinib    | Lymphoma                                         | ted Therapy Directed by Genetic Testing in Treating Patients With Advanced Refractory Solid Tumors, Lymphomas, or Multiple Myeloma (The MATCH Screening Trial)        |
| SDL   | Pertuzumab   | Lymphoma                                         | Serial Measurements of Molecular and Architectural Responses to Therapy (SMMART) PRIME Trial                                                                          |
| SDL   | Vandetanib   | Leukemia                                         | Vandetanib and Bevacizumab in Treating Patients With Advanced Solid Tumors or Lymphoma                                                                                |
| SDL   | Pertuzumab   | Precursor T-Cell Lymphoblastic Leukemia-Lymphoma | Vandetanib and Bevacizumab in Treating Patients With Advanced Solid Tumors or Lymphoma                                                                                |





**Supplementary Table 4: Mapping between tumors and cancer types**

| <b>Repositioning of the Cancer</b>            | <b>Cancer Type</b> | <b>Cancer Type Name</b>                                     |
|-----------------------------------------------|--------------------|-------------------------------------------------------------|
| Familial medullary thyroid carcinoma          | THCA               | Thyroid carcinoma                                           |
| Hereditary Breast and Ovarian Cancer Syndrome | BRCA;OV            | Breast invasive carcinoma;Ovarian serous cystadenocarcinoma |
| Ovarian Carcinoma                             | OV                 | Ovarian serous cystadenocarcinoma                           |
| Melanoma-Pancreatic Cancer Syndrome           | SKCM;PAAD          | Skin Cutaneous Melanoma;Pancreatic adenocarcinoma           |
| Small cell carcinoma of lung                  | LUAD               | Lung adenocarcinoma                                         |
| Carcinoma,Pancreatic Ductal                   | PAAD               | Pancreatic adenocarcinoma                                   |
| Leukemia, T-Cell                              | LAML               | Acute Myeloid Leukemia                                      |
| Lymphoma                                      | NULL               | NULL                                                        |
| Precursor T-Cell Lymphoblastic Leukemia-      | LAML               | Acute Myeloid Leukemia                                      |
| Lymphoma                                      | NULL               | NULL                                                        |
| Retinoblastma                                 | NULL               | NULL                                                        |



**Supplementary Table 5. Primer sequences used in this study**

| <b>Gene</b>    | <b>Sequence</b>          |
|----------------|--------------------------|
| CDKN2A-Forward | TCTGGAGTGAGCACTCACGC     |
| CDKN2A-Reverse | GCTTGTCATGAAGTCGACAGCTTT |
| GAPDH1-Forward | ATGACATCAAGAAGGTGGTG     |
| GAPDH1-Reverse | CATACCAGGAAATGAGCTTG     |
